# Supplementary material
Source: Springer Nature journal article supplement (https://www.springermedizin.de/resource/supplementary/12963_2012_206_MOESM2_ESM.pdf/9572344)
Supplement: MOESM2 [file 9572344]

| <b>QUESTÕES DE SEGURANÇA ALIMENTAR</b> |                                                                                                                                                                                            |                                                                |                                                   |
|----------------------------------------|--------------------------------------------------------------------------------------------------------------------------------------------------------------------------------------------|----------------------------------------------------------------|---------------------------------------------------|
| 1                                      | Nas últimas quatro semanas, você se preocupou que na sua casa não teria alimento suficiente?                                                                                               | Não = 00; Raramente = 01<br>Às vezes = 02; Frequentemente = 03 | <input type="checkbox"/> <input type="checkbox"/> |
| 2                                      | Nas últimas quatro semanas, você ou algum membro da casa não pode comer algum alimento preferido por falta de recursos?                                                                    | Não = 00; Raramente = 01<br>Às vezes = 02; Frequentemente = 03 | <input type="checkbox"/> <input type="checkbox"/> |
| 3                                      | Nas últimas quatro semanas, você ou algum membro da sua casa teve de comer uma variedade limitada de alimentos devido a falta de recursos?                                                 | Não = 00; Raramente = 01<br>Às vezes = 02; Frequentemente = 03 | <input type="checkbox"/> <input type="checkbox"/> |
| 4                                      | Nas últimas quatro semanas, você ou algum membro da sua casa teve de comer algum alimento que realmente não queriam comer devido a falta de recursos para obter outros tipos de alimentos? | Não = 00; Raramente = 01<br>Às vezes = 02; Frequentemente = 03 | <input type="checkbox"/> <input type="checkbox"/> |
| 5                                      | Nas últimas quatro semanas, você ou algum membro da sua casa teve de comer uma refeição menor do que você sentiu que precisava porque não havia comida suficiente?                         | Não = 00; Raramente = 01<br>Às vezes = 02; Frequentemente = 03 | <input type="checkbox"/> <input type="checkbox"/> |
| 6                                      | Nas últimas quatro semanas, você ou algum membro da sua casa teve de fazer menos refeições no dia porque não havia comida suficiente?                                                      | Não = 00; Raramente = 01<br>Às vezes = 02; Frequentemente = 03 | <input type="checkbox"/> <input type="checkbox"/> |
| 7                                      | Nas últimas quatro semanas, faltou algum tipo de alimento na sua casa devido a falta de recursos para comprar?                                                                             | Não = 00; Raramente = 01<br>Às vezes = 02; Frequentemente = 03 | <input type="checkbox"/> <input type="checkbox"/> |
| 8                                      | Nas últimas quatro semanas, você ou algum membro da sua casa foram dormir a noite com fome porque não existia alimento suficiente?                                                         | Não = 00; Raramente = 01<br>Às vezes = 02; Frequentemente = 03 | <input type="checkbox"/> <input type="checkbox"/> |
| 9                                      | Nas últimas quatro semanas, você ou algum membro da sua casa ficaram um dia e uma noite inteira sem comer nada, porque não havia comida suficiente?                                        | Não = 00; Raramente = 01<br>Às vezes = 02; Frequentemente = 03 | <input type="checkbox"/> <input type="checkbox"/> |

| <b>PREGUNTAS SOBRE SEGURIDAD ALIMENTARIA</b> |                                                                                                                                                                                                                  |                                                       |                                                   |
|----------------------------------------------|------------------------------------------------------------------------------------------------------------------------------------------------------------------------------------------------------------------|-------------------------------------------------------|---------------------------------------------------|
| 1                                            | ¿En las últimas cuatro semanas, ha estado usted preocupada porque en su hogar no tenían suficiente comida?                                                                                                       | No = 00; Raramente = 01<br>A veces= 02; A menudo = 03 | <input type="checkbox"/> <input type="checkbox"/> |
| 2                                            | ¿En las últimas cuatro semanas, usted o algún miembro de su hogar no ha podido comer el tipo de comida de su preferencia por falta de recursos?                                                                  | No = 00; Raramente = 01<br>A veces= 02; A menudo = 03 | <input type="checkbox"/> <input type="checkbox"/> |
| 3                                            | ¿En las últimas cuatro semanas, usted o algún miembro de su hogar ha comido una limitada variedad de alimentos por falta de recursos?                                                                            | No = 00; Raramente = 01<br>A veces= 02; A menudo = 03 | <input type="checkbox"/> <input type="checkbox"/> |
| 4                                            | ¿En las últimas cuatro semanas, usted o algún miembro de su hogar no ha tenido que comer algunos alimentos que a ustedes realmente no les gusta comer por falta de recursos para obtener otro tipo de alimentos? | No = 00; Raramente = 01<br>A veces= 02; A menudo = 03 | <input type="checkbox"/> <input type="checkbox"/> |
| 5                                            | ¿En las últimas cuatro semanas, usted o algún miembro de su hogar ha comido menos alimentos de los que usted siente que necesitaba porque no había suficiente comida?                                            | No = 00; Raramente = 01<br>A veces= 02; A menudo = 03 | <input type="checkbox"/> <input type="checkbox"/> |
| 6                                            | ¿En las últimas cuatro semanas, usted o algún miembro del hogar, se ha saltado alguna comida del día porque no había suficiente comida?                                                                          | No = 00; Raramente = 01<br>A veces= 02; A menudo = 03 | <input type="checkbox"/> <input type="checkbox"/> |
| 7                                            | ¿En las últimas cuatro semanas, ha habido alguien en su hogar que no recibiera comida para poder dar a los demás?                                                                                                | No = 00; Raramente = 01<br>A veces= 02; A menudo = 03 | <input type="checkbox"/> <input type="checkbox"/> |
| 8                                            | ¿En las últimas cuatro semanas, usted o algún miembro de su hogar, se ha ido a dormir por la noche con hambre porque no había suficiente comida?                                                                 | No = 00; Raramente = 01<br>A veces= 02; A menudo = 03 | <input type="checkbox"/> <input type="checkbox"/> |
| 9                                            | ¿En las últimas cuatro semanas, usted o algún miembro de su hogar, ha pasado todo el día y noche sin comer nada porque no había suficiente comida?                                                               | No = 00; Raramente = 01<br>A veces= 02; A menudo = 03 | <input type="checkbox"/> <input type="checkbox"/> |

| ڪاڏ خوراڪ بابت سوال |                                                                                                                                                                                                 |                                                         |                                                   |
|---------------------|-------------------------------------------------------------------------------------------------------------------------------------------------------------------------------------------------|---------------------------------------------------------|---------------------------------------------------|
| سوال نمبر           | سوال                                                                                                                                                                                            | ڪوڊ                                                     | جواب                                              |
| 1                   | ڇا گذريل مهيني (چار هفتن) دوران توهان کي اها پریشاني رهي ته توهان وٽ پورو پيٽ ڀري ڪاڏن جيٽرو ڪاڏو ناهي؟                                                                                         | نه = 00<br>ڪڏهن ڪڏهن = 02<br>اڪثر = 03<br>تمام گهٽ = 01 | <input type="checkbox"/> <input type="checkbox"/> |
| 2                   | ڇا گذريل مهيني (چار هفتن) دوران توهان يا توهان جي گهر جو ڪو ڀاتي ڪو پسنديد ه / خاص طعام يا ڪاڏو ڪاڏن چاهيندو هجي پر پئسي ڏوڪڙ يا وسيلو نه هجڻ ڪري نه ڪائي سگهيو هجي؟                            | نه = 00<br>ڪڏهن ڪڏهن = 02<br>اڪثر = 03<br>تمام گهٽ = 01 | <input type="checkbox"/> <input type="checkbox"/> |
| 3                   | ڇا گذريل مهيني (چار هفتن) دوران پئسي ڏوڪڙ/وسيلن جي نه هجڻ ڪري توهان ساڳئي / چند قسم جا کاڌا کائيندا هجو؟                                                                                        | نه = 00<br>ڪڏهن ڪڏهن = 02<br>اڪثر = 03<br>تمام گهٽ = 01 | <input type="checkbox"/> <input type="checkbox"/> |
| 4                   | ڇا گذريل مهيني (چار هفتن) دوران توهان يا توهان جي گهر جو ڪو ڀاتي اهڙو ڪاڏو کائيندو هجي جيڪو حقيقت ۾ توهان ڪاڏن ئي نه چاهيندا هجو پر پئسي ڏوڪڙ يا وسيلو نه هجڻ ڪري توهان کاڌا نه وٺي سگهندا هجو؟ | نه = 00<br>ڪڏهن ڪڏهن = 02<br>اڪثر = 03<br>تمام گهٽ = 01 | <input type="checkbox"/> <input type="checkbox"/> |
| 5                   | ڇا گذريل مهيني (چار هفتن) دوران توهان يا توهان جي گهر جو ڪو ڀاتي گهٽ ڪاڏو ڪائي سگهيو هجي يا جيٽري بڪ هجي اوترو نه ڪائي سگهيو هجي ڇا ڪاڏن ته توهان جي گهر ۾ ڪاڏو پورو نه هيو؟                    | نه = 00<br>ڪڏهن ڪڏهن = 02<br>اڪثر = 03<br>تمام گهٽ = 01 | <input type="checkbox"/> <input type="checkbox"/> |
| 6                   | ڇا گذريل مهيني (چار هفتن) دوران ڪاڏو گهٽ هجڻ ڪري توهان يا توهان جي گهر جو ڪو ڀاتي گهٽ ويلا (ٽائيم) ماني ڪائي سگهيو هجي؟                                                                         | نه = 00<br>ڪڏهن ڪڏهن = 02<br>اڪثر = 03<br>تمام گهٽ = 01 | <input type="checkbox"/> <input type="checkbox"/> |
| 7                   | ڇا گذريل مهيني (چار هفتن) دوران توهان وٽ ڪاڏن لاءِ ڪجهه به نه هجي ڇاڪاڻ ته توهان وٽ پئسا ڏوڪڙ وسيلو نه هئا جو توهان ڪجهه ڪاڏن لاءِ ڪاڏو خريد ڪري سگهيو؟                                         | نه = 00<br>ڪڏهن ڪڏهن = 02<br>اڪثر = 03<br>تمام گهٽ = 01 | <input type="checkbox"/> <input type="checkbox"/> |
| 8                   | ڇا گذريل مهيني (چار هفتن) دوران گهريل ڪاڏو نه هجڻ جي ڪري رات جو توهان يا توهان جي گهر جو ڪو ڀاتي بنا ڪاڏو ڪاڏن جي بکيو سٺو هجي؟                                                                 | نه = 00<br>ڪڏهن ڪڏهن = 02<br>اڪثر = 03<br>تمام گهٽ = 01 | <input type="checkbox"/> <input type="checkbox"/> |
| 9                   | ڇا گذريل مهيني (چار هفتن) دوران ڪاڏو نه هجڻ ڪري توهان يا توهان جي گهر جو ڪو ڀاتي سڄي ڏينهن ۽ رات ۾ ڪجهه به نه ڪائي سگهيو هجي؟                                                                   | نه = 00<br>ڪڏهن ڪڏهن = 02<br>اڪثر = 03<br>تمام گهٽ = 01 | <input type="checkbox"/> <input type="checkbox"/> |

Online Supporting Material  
**SWAHILI**

| # | Question                                                                                                                                                                                                                                                     | Code                                                                      | Response                                          |
|---|--------------------------------------------------------------------------------------------------------------------------------------------------------------------------------------------------------------------------------------------------------------|---------------------------------------------------------------------------|---------------------------------------------------|
| 1 | Katika kipindi cha wiki nne zilizopita, ulikuwa na wasiwasi kuwa nyumbani kwako hamtakuwa na chakula cha kutosha?                                                                                                                                            | Hapana = 00; Mara chache = 01; Wakati mwingine = 02; Wakati mwingi = 03   | <input type="checkbox"/> <input type="checkbox"/> |
| 2 | Katika wiki nne zilizopita, je wewe ama mkazi mwingine wa kaya yako hakuweza kula chakula anachopenda kutokana na upungufu wa mahitaji?                                                                                                                      | Hapana = 00; Mara chache = 01; Wakati mwingine = 02; Mara nyingi = 03     | <input type="checkbox"/> <input type="checkbox"/> |
| 3 | Katika wiki nne zilizopita, je wewe ama mkazi mwingine wa kaya yako alilazimika kula aina ya chakula ambacho hakuwa amependa kutokana na upungufu wa aina tofauti za chakula ambao ulisababishwa na upungufu wa mahitaji ya kuwa na aina tofauti ya vyakula. | Hapana = 00; Mara chache = 01; Wakati mwingine = 02; Mara nyingi = 03= 03 | <input type="checkbox"/> <input type="checkbox"/> |
| 4 | Katika wiki nne zilizopita, je wewe ama mkazi mwingine wa kaya yako alikula chakula ambacho hukupenda kula kwa sababu ya upungufu wa mahitaji ya aina nyingine ya chakula?                                                                                   | Hapana = 00; Mara chache = 01; Wakati mwingine = 02; Mara nyingi = 03     | <input type="checkbox"/> <input type="checkbox"/> |
| 5 | Katika wiki nne zilizopita, je wewe ama mkazi mwingine wa kaya yako alihitajika kula kiasi kidogo cha chakula kulivyo unavyodhani ilihitajika kutokana na kutokuwapo chakula cha kutosha?                                                                    | Hapana = 00; Mara chache = 01; Wakati mwingine = 02; Mara nyingi = 03= 03 | <input type="checkbox"/> <input type="checkbox"/> |
| 6 | Katika wiki nne zilizopita, je wewe ama mkazi mwingine wa kaya yako alilazimika kula milo michache katika siku kwa sababu hapakuwa na chakula cha kutosha?                                                                                                   | Hapana = 00; Mara chache = 01; Wakati mwingine = 02; Mara nyingi = 03     | <input type="checkbox"/> <input type="checkbox"/> |
| 7 | Katika wiki nne zilizopita, je kulikuwa hakuna chakula cha aina yoyote cha kula nyumbani kwako kutokana na kutokuwepo mahitaji ya kutengeneza chakula?                                                                                                       | Hapana = 00; Mara chache = 01; Wakati mwingine = 02; Mara nyingi = 03= 03 | <input type="checkbox"/> <input type="checkbox"/> |
| 8 | Katika wiki nne zilizopita, je wewe ama mkazi mwingine wa kaya yako kuna aliyekwenda kulala akiwa na njaa kwa sababu hapakuwa na chakula cha kutosha?                                                                                                        | Hapana = 00; Mara chache = 01; Wakati mwingine = 02; Mara nyingi = 03     | <input type="checkbox"/> <input type="checkbox"/> |
| 9 | Katika wiki nne zilizopita, je wewe ama mkazi mwingine wa kaya yako kuna aliyekaa na njaa mchana na usiku kucha bila kula chochote kwa sababu hapakuwepo chakula cha kutosha?                                                                                | Hapana = 00; Mara chache = 01; Wakati mwingine = 02; Mara nyingi = 03= 03 | <input type="checkbox"/> <input type="checkbox"/> |

**FOOD SECURITY QUESTIONS**

|   |                                                                                                                                                                                                                                                                                                                                        |                                                                                                                 |                                                   |
|---|----------------------------------------------------------------------------------------------------------------------------------------------------------------------------------------------------------------------------------------------------------------------------------------------------------------------------------------|-----------------------------------------------------------------------------------------------------------------|---------------------------------------------------|
| 1 | In the past four weeks, did you worry that your household would not have enough food?<br>वित्तको ४ हप्तामा, तपाईंको घरमा खानेकुरा पुग्ने छैन भन्ने कुराले तपाईंलाई पिर परेको थियो ?                                                                                                                                                    | No = 00; Rarely = 01<br>Sometimes = 02; Often = 03<br>छैन = 00; आकल भुक्तल = 0१, कहिलेकाही = 0२, प्रायःजसो = 0३ | <input type="checkbox"/> <input type="checkbox"/> |
| 2 | In the past four weeks, were you or any household member not able to eat the kinds of foods you preferred because of a lack of resources?<br>वित्तको ४ हप्तामा, तपाईं वा तपाईंको परिवारको कुनै सदस्यले आफूलाई मन परेको खाना स्रोतको कमीले गर्दा खान सक्नुभएको छैन ?                                                                    | No = 00; Rarely = 01<br>Sometimes = 02; Often = 03<br>छैन = 00; आकल भुक्तल = 0१, कहिलेकाही = 0२, प्रायःजसो = 0३ | <input type="checkbox"/> <input type="checkbox"/> |
| 3 | In the past four weeks, did you or any household member have to eat a limited variety of foods due to a lack of resources?<br>वित्तको ४ हप्तामा, तपाईं वा तपाईंको परिवारको कुनै सदस्यले स्रोतको कमीले गर्दा सिमित परिकारका खाना मात्र खानुभएको छ ?                                                                                     | No = 00; Rarely = 01<br>Sometimes = 02; Often = 03<br>छैन = 00; आकल भुक्तल = 0१, कहिलेकाही = 0२, प्रायःजसो = 0३ | <input type="checkbox"/> <input type="checkbox"/> |
| 4 | In the past four weeks, did you or any household member have to eat some foods that you really did not want to eat because of a lack of resources to obtain other types of food?<br>वित्तको ४ हप्तामा, तपाईं वा तपाईंको परिवारको कुनै सदस्यले साधन स्रोतको कमीले गर्दा खानै मन नपर्ने खाना खानपरेको छ (मन परेको खाना किन्न नसक्नाले) ? | No = 00; Rarely = 01<br>Sometimes = 02; Often = 03<br>छैन = 00; आकल भुक्तल = 0१, कहिलेकाही = 0२, प्रायःजसो = 0३ | <input type="checkbox"/> <input type="checkbox"/> |
| 5 | In the past four weeks, did you or any household member have to eat a smaller meal than you felt you needed because there was not enough food?<br>वित्तको ४ हप्तामा, तपाईं वा तपाईंको परिवारको कुनै सदस्यले पर्याप्त खानाको कमीले गर्दा आफूले चाहेको भन्दा कम खाना खानुपरेको छ ?                                                       | No = 00; Rarely = 01<br>Sometimes = 02; Often = 03<br>छैन = 00; आकल भुक्तल = 0१, कहिलेकाही = 0२, प्रायःजसो = 0३ | <input type="checkbox"/> <input type="checkbox"/> |
| 6 | In the past four weeks, did you or any other household member have to eat fewer meals in a day because there was not enough food?<br>वित्तको ४ हप्तामा, तपाईं वा तपाईंको परिवारको कुनै सदस्यले पर्याप्त खानाको कमीले दिनमा थोरै पटक खाना खान' परेको छ ?                                                                                | No = 00; Rarely = 01<br>Sometimes = 02; Often = 03<br>छैन = 00; आकल भुक्तल = 0१, कहिलेकाही = 0२, प्रायःजसो = 0३ | <input type="checkbox"/> <input type="checkbox"/> |
| 7 | In the past four weeks, was there ever no food to eat of any kind in your household because of lack of resources to get food?<br>वित्तको ४ हप्तामा, साधन स्रोतको कमीले गर्दा तपाईंको घरमा कुनै पनि खाना नभएको अवस्था थियो ?                                                                                                            | No = 00; Rarely = 01<br>Sometimes = 02; Often = 03<br>छैन = 00; आकल भुक्तल = 0१, कहिलेकाही = 0२, प्रायःजसो = 0३ | <input type="checkbox"/> <input type="checkbox"/> |
| 8 | In the past four weeks, did you or any household member go to sleep at night hungry because there was not enough food?                                                                                                                                                                                                                 | No = 00; Rarely = 01<br>Sometimes = 02; Often = 03<br>छैन = 00; आकल भुक्तल = 0१, कहिलेकाही = 0२, प्रायःजसो = 0३ | <input type="checkbox"/> <input type="checkbox"/> |

|   |                                                                                                                                                                                                                                                                               |                                                                                                                               |                                                   |
|---|-------------------------------------------------------------------------------------------------------------------------------------------------------------------------------------------------------------------------------------------------------------------------------|-------------------------------------------------------------------------------------------------------------------------------|---------------------------------------------------|
|   | <p>वित्तको ४ हप्तामा, तपाईं वा तपाईंको परिवारको कुनै सदस्य पर्याप्त खानेकुरा नभएकोले राती भोकै सुत्नुपरेको छ ?</p>                                                                                                                                                            |                                                                                                                               |                                                   |
| 9 | <p>In the past four weeks, did you or any household member go a whole day and night without eating anything because there was not enough food?</p> <p>वित्तको ४ हप्तामा, तपाईं वा तपाईंको परिवारको कुनै सदस्य पर्याप्त खानेकुरा नभएकोले दिनभर र राती भोकै सुत्नुपरेको छ ?</p> | <p>No = 00; Rarely = 01<br/> Sometimes = 02; Often = 03<br/> छैन = 00; आकल भुकल = 0१, कहिलेकाही = 0२,<br/> प्रायःजसो = 0३</p> | <input type="checkbox"/> <input type="checkbox"/> |
